mechanism responsible for the ventricular bigeminy is most likely due to an imbalance between parasympathetic and sympathetic activities with increases in both heart rate and blood pressure.<sup>4</sup>

The dose of thiopental sodium (30 mg/kg) used in this study<sup>1</sup> is relatively higher than the commonly used induction dosage of 15–20 mg/kg, iv prior to maintenance of inhalational anesthesia. Further, in these vagotomized dogs, it is quite possible thiopental sodium caused the observed bigeminy. This, in combination with halothane anesthesia and infusion of epinephrine, may have resulted in an increase in both heart rate and blood pressure in this study, although it was not mentioned.<sup>1</sup>

Thus, while the ventricular bigeminy reported in this study may have in fact originated from the interventricular septum, it is not possible to unequivocally state that in dogs the bigeminy was due to the combination of halothane anesthesia and epinephrine infusion. To rule out the possible effects of thiopental sodium, one must induce and maintain anesthesia with halothane alone.

Anesthesiology  
58:395–396, 1983

*In reply:*—We thank Drs. Seeler and Thurmon for their comment and apologize to them and other readers for not correcting a proofreading error. The dose of thiopental used in our experiments was in fact 20 mg/kg rather than 30 mg/kg. This decreases the probability of the arrhythmia being due to the combination of thiopental–epinephrine alone. We have observed arrhythmias including bigeminy immediately after injection of thiobarbiturates, but these are usually of short duration and were never present at the time halothane administration was begun. Thiobarbiturate-induced arrhythmias first were reported by Gruber.<sup>1</sup> Both blood pressure and hypercapnia were found to be important to their genesis (Gruber *et al.*,<sup>2</sup> Woods *et al.*,<sup>3</sup> and Johnstone<sup>4</sup>).

There is clearly an interaction between thiopental and sensitizing anesthetics. We established this in the case of cyclopropane<sup>5</sup> and have seen recent confirmation and extension for the case of halothane.<sup>6</sup> The doses of epinephrine required to cause various types of arrhythmia are increased in the absence of thiopental, but each type may be demonstrated. Potentiation of very long duration is seen on injection of 5 mg/kg, iv, into cyclopropane-anesthetized dogs, or brief potentiation may be caused by injection of less than 2 mg into the circumflex coronary artery.<sup>5</sup>

DAVID C. SEELER, D.V.M., M.Sc.  
*Teaching Associate*

JOHN C. THURMON, D.V.M., M.S.  
*Professor and Head*

*Department of Anesthesiology  
College of Veterinary Medicine  
University of Illinois  
Urbana, Illinois 61801*

#### REFERENCES

1. Smith ER, Dresel PE: Site of origin of halothane-epinephrine arrhythmia determined by direct and echocardiographic recordings. *ANESTHESIOLOGY* 57:98–109, 1982
2. Muir WW: Electrocardiographic interpretation of thiobarbiturate-induced dysrhythmias in dogs. *J Am Vet Med Assoc* 170:1419–1424, 1977
3. Musselman EE: Arrhythmogenic properties of thiamylal sodium in the dog. *J Am Vet Med Assoc* 168:145–148, 1976
4. Muir WW: Thiobarbiturate-induced dysrhythmias: The role of heart rate and autonomic imbalance. *Am J Vet Res* 38:1377–1381, 1977

(Accepted for publication October 20, 1982.)

We therefore believe that the arrhythmia we observed was indeed due to thiopental-halothane-epinephrine.

PETER E. DRESEL, PH.D.  
*Professor and Head  
Department of Pharmacology  
Dalhousie University  
Sir Charles Tupper Medical Bldg  
Halifax, NS, Canada B3H 4H7*

ELDON R. SMITH, M.D.  
*Professor of Medicine and Medical Physiology  
Head, Cardiology Division  
Department of Medicine  
Division of Cardiology  
The University of Calgary  
3330 Hospital Drive, N. W.  
Calgary, Alberta, Canada T2N 4N1*

#### REFERENCES

1. Gruber CM: The effects of anaesthetic doses of sodium thio-pentobarbital, sodium thio-ethamyl and Pentothal sodium upon the respiratory system, the heart, and blood pressure in experimental animals. *J Pharmacol Exp Ther* 60:143, 1937
2. Gruber CM, Haury VG, Gruber CM Jr: The cardiac arrhythmia characteristic effect of the thio-barbiturates (Pentothal, thio-

- pentobarbital and thio-ethyl) as influenced by changes in arterial blood pressure. *J Pharmacol Exp Ther* 63:193, 1938
3. Woods LA, Wyngaarden JB, Rennick B, Seevers MH: Cardiovascular toxicity of thiobarbiturates: comparison of thiopental and 5-allyl-5 (1-methylbutyl)-2-thiobarbiturate (Surital) in dogs. *J Pharmacol Exp Ther* 95:328, 1949
  4. Johnstone M: Pulse irregularities during thiopentone anaesthesia. *Anaesthesia* 6:138, 1951

5. MacCannell KL, Dresel PE: Potentiation by Thiopental of Cyclopropanedrenaline Cardiac Arrhythmias, *Can J Physiol Pharmacol* 42:627, 1964
6. Atlee JL III, Malkinson CE: Potentiation by thiopental of halothane-epinephrine-induced arrhythmias in dogs. *ANESTHESIOLOGY* 57:285-288, 1982

(Accepted for publication October 20, 1982.)

Anesthesiology  
58:396, 1983

## Hypothermia and the Electroencephalogram

*To the Editor:*—In their article on hypothermia and thiopental, Quasha *et al.*<sup>1</sup> observed burst-suppression in their control group, and attributed this EEG finding to the hypothermia common to all groups. This is remarkable, because neither our clinical experience nor the published reports of others<sup>2,3</sup> supports the observation that moderate hypothermia (25–30° C) by itself produces prominent burst-suppression. Their study was performed at the start of cardiopulmonary bypass, a period when many physiologic changes are being imposed upon the previously stable cerebral conditions. Included are thermal gradients (not just hypothermia) and acute hemodilution, with associated changes in serum proteins, electrolytes, glucose, osmolarity, and blood viscosity and oxygen-carrying capacity. Halothane was administered during the study period to maintain anesthetic level; however, the anesthetic potency of this agent doubles when the temperature is reduced to 27° C.<sup>4</sup> Thus, an anesthetic steady state may not have been present. The presence of an unusual, and possibly abnormal, control state raises questions about the general applicability of their conclusions. Accordingly, studies under stable hypothermic conditions seem to be in-

dicated before these conclusions (no matter how reasonable) can be accepted.

WARREN J. LEVY, M.D.  
Assistant Professor of Anesthesiology  
Department of Anesthesia  
University of Pennsylvania  
3400 Spruce Street  
Philadelphia, Pennsylvania 19104

## REFERENCES

1. Quasha AL, Tinker JH, Sharbrough FW: Hypothermia plus thiopental: Prolonged electroencephalographic suppression. *ANESTHESIOLOGY* 55:636-640, 1981
2. Cohen ME, Olszowka JS, Subramanian S: Electroencephalographic and neurologic correlates of deep hypothermia and circulatory arrest in infants. *Ann Thorac Surg* 23:238-244, 1977
3. Martin JT, Faulconer A Jr, Bickford RG: Electroencephalography in anesthesia. *ANESTHESIOLOGY* 20:359-376, 1959
4. Vitez TS, White PF, Eger EI II: Effects of hypothermia on halothane MAC and isoflurane MAC in the rat. *ANESTHESIOLOGY* 41:80-81, 1974

(Accepted for publication October 22, 1982.)

Anesthesiology  
58:396-397, 1983

*In reply:*—Dr. Warren Levy's letter raises a number of important questions and indirectly suggests likely answers. First, as Dr. Levy indicated, it is known that hypothermia significantly increases the potency of halothane. As noted, this, plus the various transient changes that occur at the start of cardiopulmonary bypass, may well explain why we observed some transient burst suppression in our control group at moderate hypothermia (25–30° C) that by itself may not produce prominent burst suppression. Further, since hypothermia has been demonstrated to potentiate the effect of

halothane, it should not be too surprising that it likely will also potentiate the effects of thiopental, which is the central point of our paper. Nonetheless, we appreciate the possible confounding effect that can be introduced by the various uncontrolled transient changes in numerous variables at the start of cardiopulmonary bypass. Therefore, although we consider our current conclusions as reasonable, we fully recognize them as tentative and in need of further verification based on more controlled studies, including basic animal studies, as well as clinical trials.
